# Supplementary material
Source: PubMed Central journal article supplement (PMC3017186)
Supplement: 0913297108_pnas.200913297SI.pdf [file 0913297108_pnas.200913297SI.pdf]

# Supporting Information

Smith et al. 10.1073/pnas.0913297108

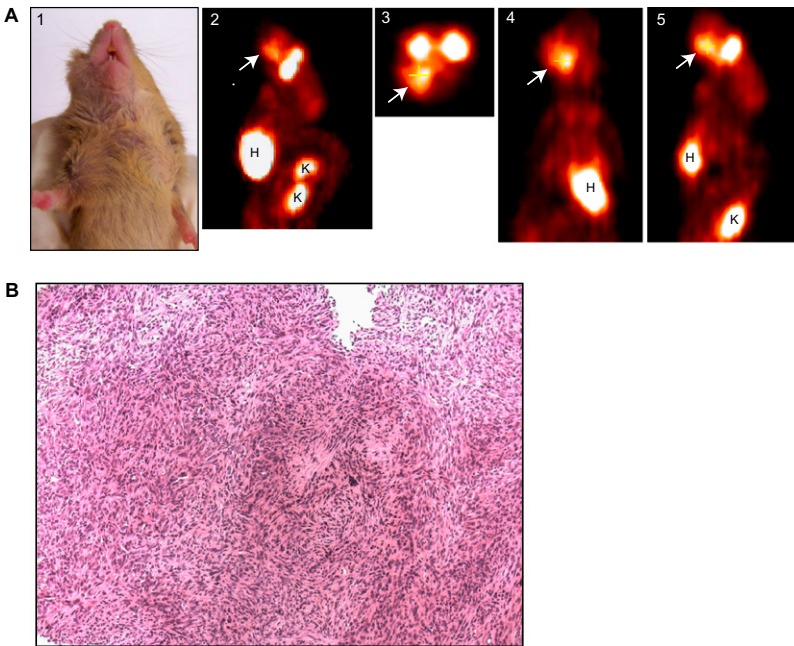

**Fig. S1.** PET analysis of *Ini1*<sup>+/-</sup> mouse with a primary rhabdoid tumor resistant to flavopiridol. (A1) Digital image of mouse E66, showing a visible mass at the face; (A2) PET projection image revealing increased <sup>18</sup>F-FDG uptake in the face; (A3–A5) Transaxial, coronal, and sagittal sections show various cross-sections of this particular PET scan. White arrows indicate the location of tumor. H, heart; K, kidney. (B) H&E-stained section of the primary tumor from mouse E66.

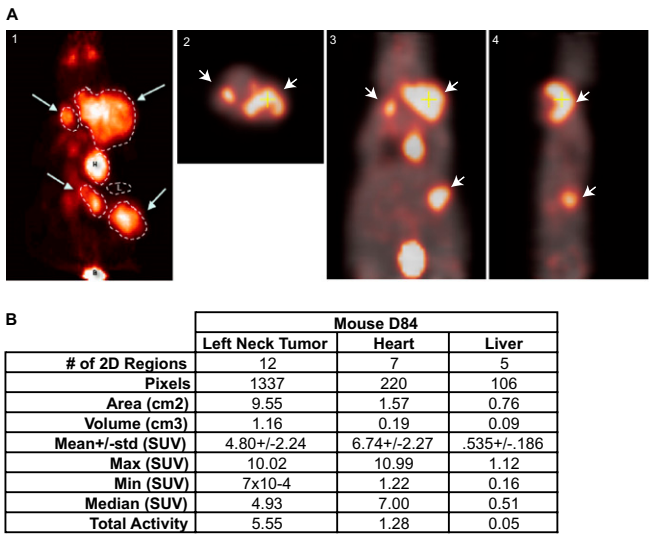

**Fig. S2.** Quantification of rhabdoid tumors using PET. (A) Quantitation of tumor masses by PET imaging. (A1) Projection image of mouse D84, with dotted white lines drawn around areas of intense 2-[(18)F]fluoro-2-deoxyglucose (<sup>18</sup>F-FDG) uptake to create a region of interest (ROI) surrounding each tumor mass. Transaxial (A2), coronal (A3), and sagittal (A4) sections show various cross-sections of the same PET scan. White arrows indicate the location of the masses. (B) Table with an example of the values obtained after defining ROIs in three dimensions and calculating the standardized uptake values (SUVs) within these regions.

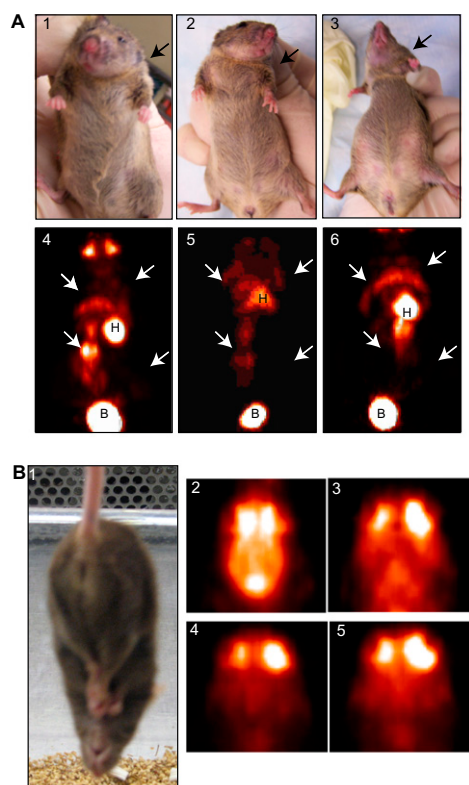

**Fig. S3.** Flavopiridol is effective in inhibiting primary rhabdoid tumors arising in *Ini1*<sup>+/-</sup> mice. (A) Digital and PET projection images of *Ini1*<sup>+/-</sup> mouse D84 treated with flavopiridol. *Upper*: Digital images; *Lower*: PET images that correspond to the digital images above. (A1 and A4) Images taken after 2-wk treatment break from flavopiridol (day 29); (A2 and A5) after the second round of treatment (day 49); (A3 and A6) 10 wk after the last treatment was given (day 120). White arrows point to the locations of tumor masses. H, heart; B, urinary bladder. (B) Digital and PET images of *Ini1*<sup>+/-</sup> mouse M3 treated with flavopiridol. (B1) Digital image showing the hind leg clasp behavioral abnormality; (B2) PET image before treatment, showing increased uptake in the cerebellum; (B3) PET image after first round of flavopiridol treatment, showing that uptake in the hindbrain had returned to normal levels; (B4) PET image after 2 wk treatment interruption; (B5) PET image after second round of treatment.



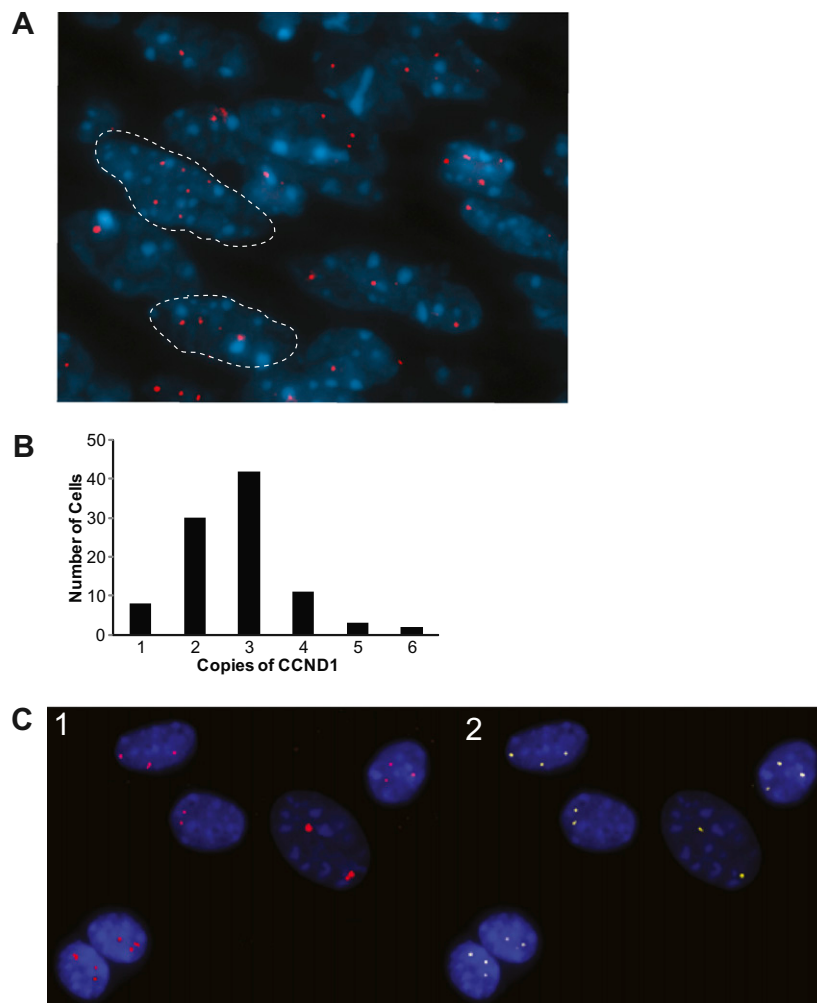

**Fig. S6.** FISH analysis showing CCND1 amplification in resistant tumors and cells. (A) FISH using probe RP24-186B2 on a paraffin section of the E7 tumor tissue. (B) Quantitation of CCND1 signal counts in tumor cells based on FISH analysis of paraffin section of E7 resistant tumor (example of an image is shown in A). (C) Interphase E7 cells hybridized with RP24-186B2 (C1) and RP24-316N16 (C2). Note the gain of signals for both CCND1 and the 3' flanking region.



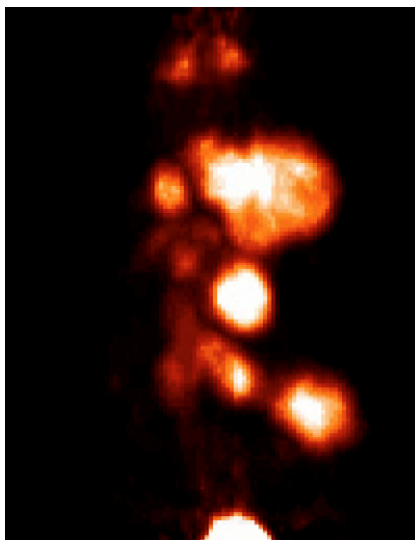

**Movie S1.** Image from mouse D84 taken on day 1, before treatment.

[Movie S1](#)

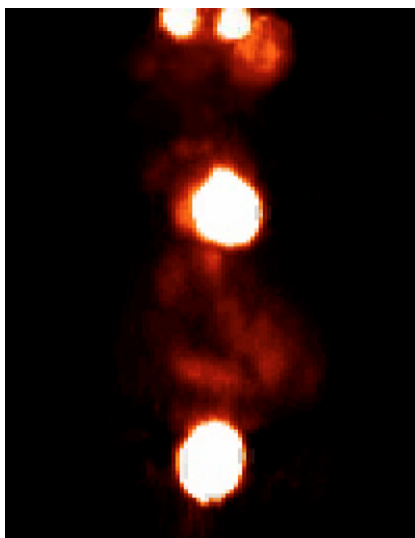

**Movie S2.** Image from mouse E7 taken on day 1, before treatment.

[Movie S2](#)

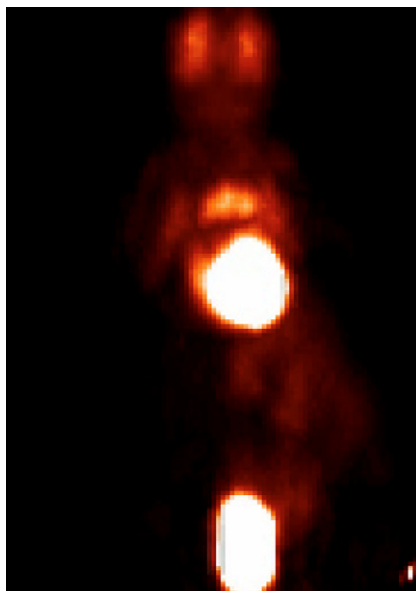

**Movie S3.** Image from mouse D84 taken on day 18, after completion of round 1 of flavopiridol treatment.

[Movie S3](#)

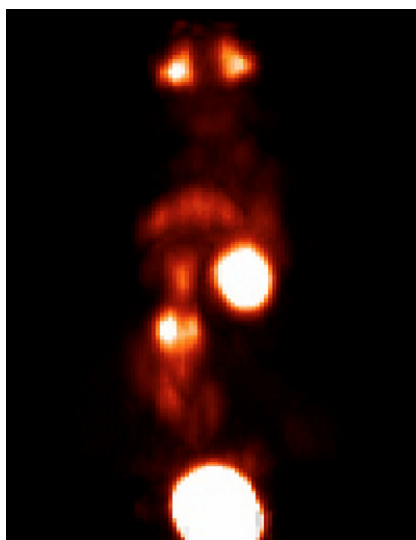

**Movie S4.** Image from mouse D84 taken on Day 29, after 2-wk treatment interruption.

[Movie S4](#)

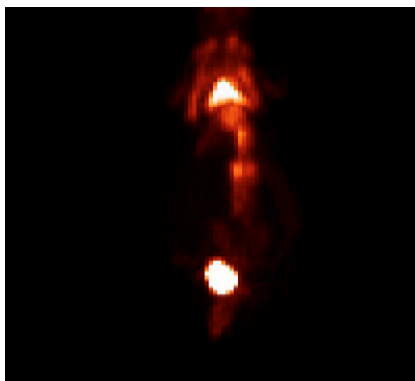

**Movie S5.** Image from mouse D84 taken on day 49, after round 2 of treatment.

[Movie S5](#)

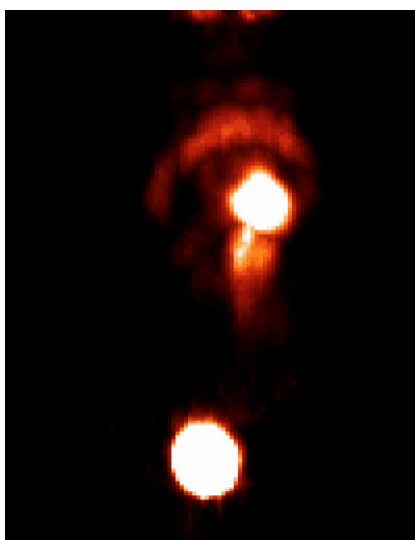

**Movie S6.** Image from mouse D84 taken on day 120, 10 wk after the last treatment was given.

[Movie S6](#)

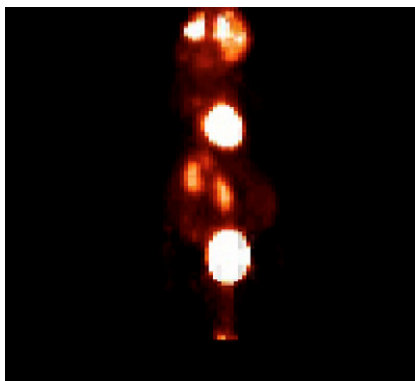

**Movie S7.** Image from mouse E7 taken on day 12 after 2 wk of treatment.

[Movie S7](#)

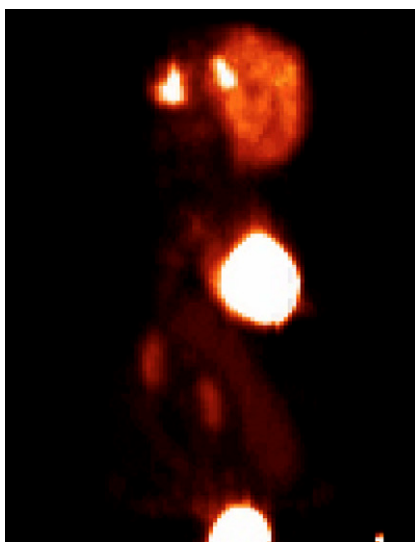

**Movie S8.** Image from mouse E7 taken on day 56, after 7 wk of continuous treatment.

[Movie S8](#)
